# Supplementary material for: Secondary Cardiovascular Disease Prevention Deficit Persists over the Years: A Multicenter Cross-Sectional Study Involving 1003 Consecutive Patients from Greece
Source: MDPI journal article supplement (doi:10.3390/endocrines5020009), 2024-03-27
Supplement: s1 [file s1]

**Table S1.** Number of subjects in each lipid lowering regimen, the mean (standard deviation) LDL-C achieved in mg/dL, the rate of subjects achieving the LDL-C goals of their respective years and the rate of subjects achieving LDL-C <55mg/dl on that regimen.

| Medication                | Dose      | Nr (%)      | Mean LDL-C (SD) | % at LDL-C goal | % at LDL-C <55mg/dl |
|---------------------------|-----------|-------------|-----------------|-----------------|---------------------|
| None                      | N/A       | 159 (15.9%) | 107.7 (48.2)    | 35/159 (22.0%)  | 12/151 (7.9%)       |
| Pravastatin               | 40mg      | 11 (1.1%)   | 92.4 (16.7)     | 1/11 (9.1%)     | 0/11 (0.0%)         |
| Pravastatin               | 20mg      | 1 (0.1%)    | 103.0 (NA)      | 0/1 (0.0%)      | 0/1 (0.0%)          |
| Simvastatin               | 10mg      | 3 (0.3%)    | 104.3 (28.0)    | 0/3 (0.0%)      | 0/3 (0.0%)          |
| Simvastatin               | 20mg      | 34 (3.4%)   | 94.9 (46.8)     | 9/34 (26.5%)    | 5/34 (14.7%)        |
| Simvastatin               | 40mg      | 14 (1.4%)   | 85 (32.2)       | 3/14 (21.4%)    | 3/14 (21.4%)        |
| Atorvastatin              | ≤10mg     | 66 (6.6%)   | 93.1 (31.2)     | 11/66 (16.7%)   | 2/66 (3.0%)         |
| Atorvastatin              | 20mg      | 150 (15.0%) | 89.9 (30.6)     | 31/150 (20.7%)  | 6/149 (4.0%)        |
| Atorvastatin              | 40mg      | 137 (13.7%) | 84.1 (26.3)     | 43/139 (30.9%)  | 13/139 (9.4%)       |
| Rosuvastatin              | 5mg       | 24 (2.4%)   | 96.1 (33.4)     | 6/24 (25.0%)    | 1/24 (4.2%)         |
| Rosuvastatin              | 10mg      | 67 (6.7%)   | 90.1 (28.1)     | 13/67 (19.4%)   | 4/67 (6.0%)         |
| Rosuvastatin              | 20mg      | 99 (9.9%)   | 79.2 (23.9)     | 28/99 (28.3%)   | 12/99 (12.1%)       |
| Rosuvastatin              | 40mg      | 15 (1.5%)   | 86.1 (35.4)     | 4/15 (26.7%)    | 2/15 (13.3%)        |
| Pitavastatin              | 1mg       | 5 (0.5%)    | 97.2 (57.5)     | 1/5 (20.0%)     | 1/5 (20.0%)         |
| Pitavastatin              | 2mg       | 11 (1.1%)   | 96.6 (27.4)     | 2/11 (18.2%)    | 2/11 (18.2%)        |
| Pitavastatin              | 4mg       | 10 (1.0%)   | 93.5 (39.2)     | 1/10 (10.0%)    | 0/10 (0.0%)         |
| Simvastatin + Ezetimibe   | 10mg/10mg | 4 (0.4%)    | 98.2 (57.7)     | 1/5 (20.0%)     | 1/4 (25.0%)         |
| Simvastatin + Ezetimibe   | 20mg/10mg | 22 (2.2%)   | 45.2 (11.6)     | 5/22 (22.7%)    | 4/22 (18.2%)        |
| Simvastatin + Ezetimibe   | 40mg/10mg | 36 (3.6%)   | 47.5 (11.9)     | 8/36 (22.2%)    | 4/35 (11.4%)        |
| Atorvastatin + Ezetimibe  | 10mg/10mg | 5 (0.5%)    | 38.6 (6.1)      | 1/5 (20.0%)     | 2/5 (40.0%)         |
| Atorvastatin + Ezetimibe  | 20mg/10mg | 33 (3.3%)   | 76.7 (28.0)     | 10/33 (30.3%)   | 6/33 (18.2%)        |
| Atorvastatin + Ezetimibe  | 40mg/10mg | 25 (2.5%)   | 67.4 (30.0)     | 11/24 (45.8%)   | 11/24 (45.8%)       |
| Rosuvastatin + Ezetimibe  | 5mg/10mg  | 3 (0.3%)    | 86.5 (29.0)     | 0/3 (0.0%)      | 0/2 (0.0%)          |
| Rosuvastatin + Ezetimibe  | 10mg/10mg | 9 (0.9%)    | 80.8 (25.8)     | 2/9 (22.2%)     | 2/9 (22.2%)         |
| Rosuvastatin + Ezetimibe  | 20mg/10mg | 27 (2.4%)   | 78.5 (37.2)     | 7/26 (26.9%)    | 6/25 (24.0%)        |
| Rosuvastatin + Ezetimibe  | 40mg/10mg | 12 (1.2%)   | 64.9 (44.0)     | 7/11 (63.6%)    | 7/12 (58.3%)        |
| Evolocumab                | 140mg     | 1 (0.1%)    | 53.0 (NA)       | 1/1 (100.0%)    | 1/1 (100.0%)        |
| Alirocumab                | 150mg     | 1 (0.1%)    | 43.0 (NA)       | 1/1 (100.0%)    | 1/1 (100.0%)        |
| Pravastatin + Ezetimibe   | 40mg/10mg | 1 (0.1%)    | 64.0 (NA)       | 0/1 (0.0%)      | 0/1 (0.0%)          |
| Pravastatin + Fenofibrate | 40/145mg  | 6 (0.6%)    | 83.4 (12.0)     | 0/6 (0.0%)      | 0/6 (0.0%)          |

|                                       |                     |          |              |              |              |
|---------------------------------------|---------------------|----------|--------------|--------------|--------------|
| Pitavastatin + Ezetimibe              | 4mg/10mg            | 1 (0.1%) | 85.0 (NA)    | 0/1 (0.0%)   | 0/1 (0.0%)   |
| Simvastatin + Fenofibrate             | 40mg/145mg          | 3 (0.3%) | 94.3 (29.7)  | 1/3 (33.3%)  | 0/3 (0.0%)   |
| Atorvastatin + Fenofibrate            | 20mg + 145mg        | 2 (0.2%) | 78.5 (54.4)  | 1/2 (50.0%)  | 1/2 (50.0%)  |
| Rosuvastatin + Fenofibrate            | 40mg/145mg          | 1 (0.1%) | 72.0 (NA)    | 0/1 (0.0%)   | 0/1 (0.0%)   |
| Evolocumab + atorvastatin + Ezetimibe | 420mg + 40mg + 10mg | 1 (0.1%) | 23.0 (NA)    | 1/1 (100.0%) | 1/1 (100.0%) |
| Fenofibrate                           | 145mg               | 2 (0.2%) | 114.5 (38.9) | 0/2 (0.0%)   | 0/2 (0.0%)   |
